# Supplementary figures and images for: A novel role for an APC2-Diaphanous complex in regulating actin organization inDrosophila
Source: Oxford University Press journal article supplement (doi:10.1242/dev.026963), 2009-03-12

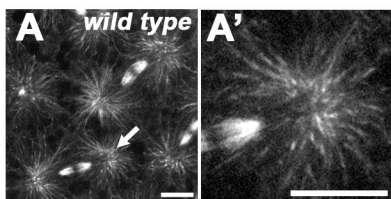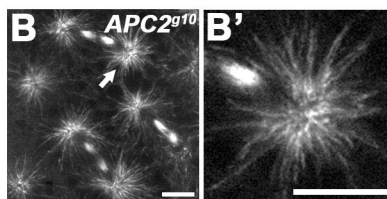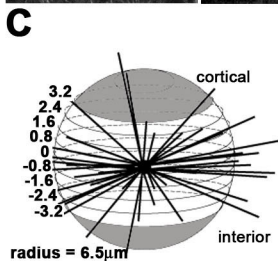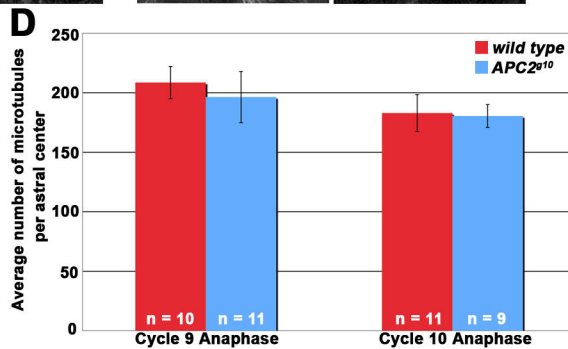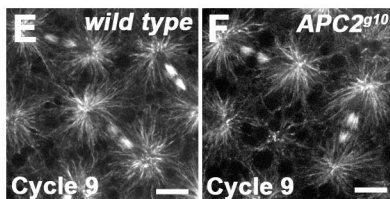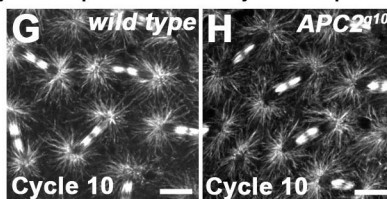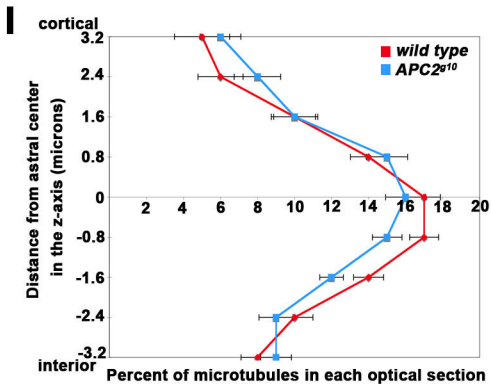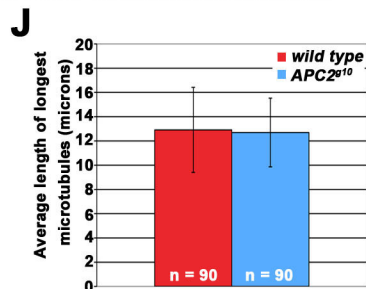

Supplement: dev026963-sup-026963-figs3.pdf [file dev026963-sup-026963-figs3.pdf]
